# Supplementary material
Source: publisher figshare collection journal article supplement (https://acs.figshare.com/ndownloader/files/3791956)
Supplement: Supplementary file 1 [file 3791956]

Supporting Information for

## **Continuous microfluidic particle separation via elasto-inertial pinched flow fractionation (eiPFF)**

**Xinyu Lu and Xiangchun Xuan<sup>\*</sup>**

*Department of Mechanical Engineering, Clemson University, Clemson, SC 29634-0921, USA*

---

<sup>\*</sup> To whom correspondence should be addressed. E-mail: [xcxuan@clemson.edu](mailto:xcxuan@clemson.edu); Fax: +1 864 656 5630; Tel: +1 864 656 7299.

### Determination of the fluid properties in Table 1 in the main text

The zero-shear viscosity,  $\eta_0$ , of the glycerol/water-based PEO solutions was calculated using the viscosity blending equation<sup>1</sup> via the reported viscosity values of aqueous PEO<sup>2</sup> and glycerol<sup>3</sup> solutions. The obtained values appear to be consistent with the experimental data reported by Yang et al.,<sup>4</sup> Nam et al.<sup>5</sup> and Rodd et al.<sup>6,7</sup> The overlap concentration,  $c^*$ , for PEO solutions was calculated from the expression of Graessley,<sup>8</sup>  $c^* = 0.77/[\eta]$  ppm where  $[\eta] = 0.072M_w^{0.65} = 897$  ml/g is the intrinsic viscosity given by the Mark-Houwink relation.<sup>2</sup> We noticed that adding glycerol into the aqueous PEO solution had been found by Rodd et al.<sup>6</sup> to decrease the intrinsic viscosity and hence increase the overlap concentration. This effect was, however, estimated to be less than 10% for the solvent we used. Therefore, the prepared non-Newtonian fluids are in the dilute (500 ppm PEO/glycerol solution) or semi-dilute (all others) regime. They all exhibit a mild shear-thinning effect as reported in earlier studies.<sup>4-7</sup> The effective relaxation time of the prepared PEO solutions was estimated from the following empirical formula,<sup>9</sup>

$$\lambda_e = 18\lambda_{Zimm}(c/c^*)^{0.65} \quad (1)$$

where  $\lambda_{Zimm}$  is the relaxation time predicted according to Zimm theory,<sup>10</sup>

$$\lambda_{Zimm} = F \frac{[\eta]M_w\eta_s}{N_A k_B T} \quad (2)$$

In the above  $F = 0.463$  is the pre-factor estimated from the Remann Zeta function using a solvent quality exponent 0.55,<sup>2</sup>  $\eta_s = 1.8$  mPa·s is the solvent (i.e., 21 wt.% glycerol/water) viscosity,<sup>3</sup>  $N_A$  is the Avogadro's constant,  $k_B$  is the Boltzmann's constant, and  $T$  is the absolute temperature.

### Clarification of eq 6 in the main text

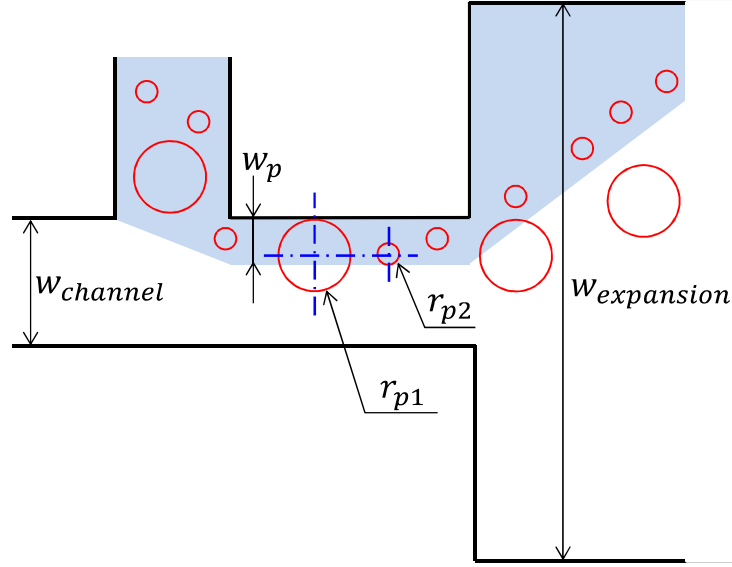

**Figure S1.** Schematic explanation on how eq 6 in the main text is obtained. The symbols  $w_p$ ,  $w_{channel}$  and  $w_{expansion}$  represent the widths of the sheath-fluid focused particle solution, the main-branch, and the channel expansion, respectively. The symbols  $r_{p1}$  and  $r_{p2}$  are the radii of the two types of particles to be separated via PFF.

The particle separation in traditional PFF arises from the dissimilar center positions for particles of different sizes in a laminar flow.<sup>11</sup> As seen from Figure S1, when the larger particles of radius  $r_{p1}$  are aligned by the sheath fluid, their center is  $r_{p1}$  away from the sidewall. Since the center of the smaller particles with radius  $r_{p2}$  can at most overlap with that of the larger ones for separation via PFF, as indicated by the dashed-dotted line in Figure S1, the width of the particle solution in the main-branch (highlighted by the background color) should be no more than  $r_{p1} + r_{p2}$ . This latter value is exactly the  $w_{p,max}$  in eq 6 in the main text.

## References

- (1) R.E. Maples, *Petroleum Refinery Process Economics*, 1993, Pennwell, Publishing, Tulsa.
- (2) L. E. Rodd, T. P. Scott, D. V. Boger, J. J. Cooper-White and G. H. McKinley, *J. Non-Newtonian Fluid Mech.*, 2005, **129**, 1-22.

- (3) N. S. Cheng, *Indust. Eng. Chem. Res.*, 2008, **47**, 3285-3288.
- (4) S. Y. Yang, J. Y. Kim, S. J. Lee, S. S. Lee and J. M. Kim, *Lab Chip*, 2011, **11**, 266-273.
- (5) J. Nam, H. Lim, D. Kim, H. Jung and S. Shin, *Lab Chip*, 2012, **12**, 1347-1354.
- (6) L. E. Rodd, J. J. Cooper-White, D. V. Boger and G. H. McKinley, *J. Non-Newtonian Fluid Mech.*, 2007, **143**, 170-191.
- (7) L. E. Rodd, D. Lee, K. H. Ahn, and J. J. Cooper-White, *J. Non-Newton. Fluid Mech.*, 2010, **165**, 1189-1203.
- (8) W. W. Graessley, *Polymer*, 1980, **21**, 258–262.
- (9) V. Tirtaatmadja, G. H. Mckinley and J. J. Cooper-White, *Phys. Fluid.*, 2006, **19**, 043101.
- (10) M. Rubinstein and R. H. Colby, *Polymer Physics*, 2003, Oxford University Press Inc.
- (11) M. Yamada, M. Nakashima and M. Seki, *Anal. Chem.*, 2004, **76**, 5465-5471.
